# Supplementary material
Source: MDPI journal article supplement (https://www.mdpi.com/1996-1073/14/21/6953)
Supplement: s1 [file s1]

## **SUPPLEMENTARY MATERIAL**

### **Conversion of Sewage Sludge and Other Biodegradable Waste Into High-Value Soil Amendment Within a Circular Bioeconomy Perspective**

Ewa Neczaj<sup>a</sup>, Anna Grosser<sup>a\*</sup>, Anna Grobelak<sup>a</sup>, Piotr Celary<sup>b</sup>, Bal Ram Singh<sup>c</sup>

<sup>a</sup> Faculty of Infrastructure and Environment, Czestochowa University of Technology,  
Czestochowa, Poland

<sup>b</sup> Central Laboratory for Measurements and Research, Jastrzebie-Zdroj, Poland

<sup>c</sup> Faculty of Environmental Sciences and Natural Resource Management, Norwegian University  
of Life, Ås, Norway;

Correspondence to:

Anna Grosser

Czestochowa University of Technology

Faculty of Infrastructure and Environment

St. Brzeznicka 60a

42-200 Czestochowa, Poland

e-mail: anna.grosser@pcz.pl

**Table S1.** Results of the factorial ANOVA (F, and p-values) applied to C/N ratio in composts ( $p \leq 0.05$ ).

| Effect                   | C/N comp.        |
|--------------------------|------------------|
| Addition                 | F=15.33, p=0.004 |
| kind of sludge           | F=10.23, p=0.013 |
| Addition *kind of sludge | F=4.51, p=0.066  |

**Table S2.** Results of factorial ANOVA for biomass yield

|                                 | F        | p      |
|---------------------------------|----------|--------|
| Soil                            | 0.5128   | 0.4843 |
| type of sludge                  | 278.6837 | 0.0000 |
| Addition                        | 67.7678  | 0.0000 |
| soil*type of sludge             | 25.6210  | 0.0001 |
| soil*addition                   | 35.1101  | 0.0000 |
| type of sludge*addition         | 26.3454  | 0.0001 |
| soil*type of<br>sludge*addition | 18.6950  | 0.0005 |
